# Supplementary material for: 3. 9. Правовые традиции наследственного права Азербайджана
Source: Springer Nature journal article supplement (doi:10.1186/s12931-019-1139-2), 2010-01-01

Supplementary Fig. 1A, B

**A**

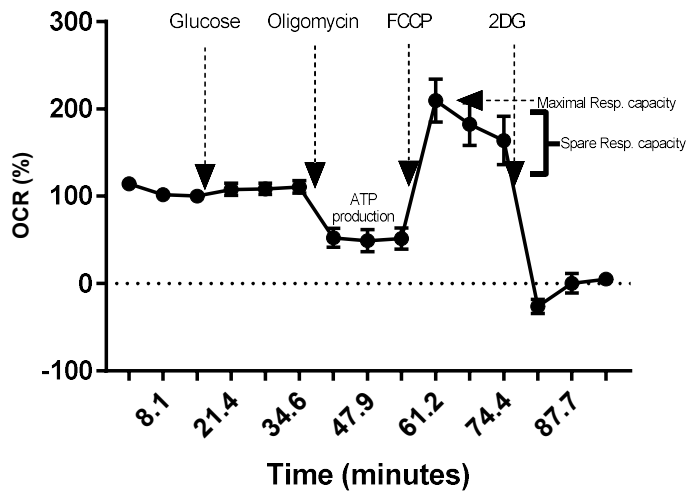

**B**

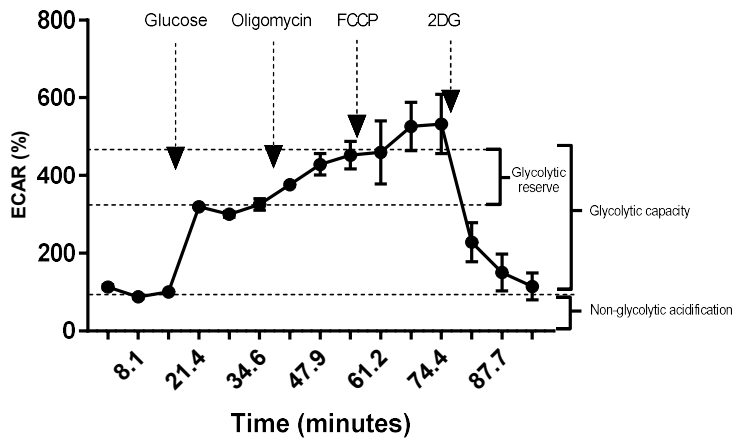

Supplement: MOESM1 [file 17023406]
